# Supplementary material for: Gene disruption by structural mutations drives selection in US rice breeding over the last century
Source: PLOS journal article supplement (doi:10.1371/journal.pgen.1009389), 2021-03-18

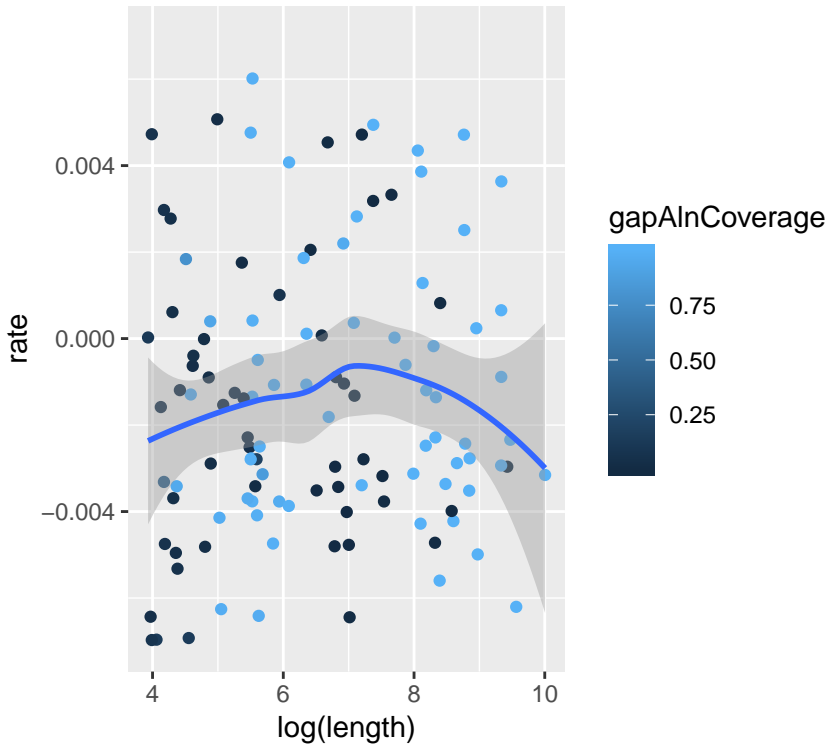

Supplement: S5 (10.1371/journal.pgen.1009389.s005) [file journal.pgen.1009389.s005]
